# Supplementary material
Source: publisher figshare collection journal article supplement (https://frontiersin.figshare.com/ndownloader/files/34459727)
Supplement: Supplementary file [file 34459727]

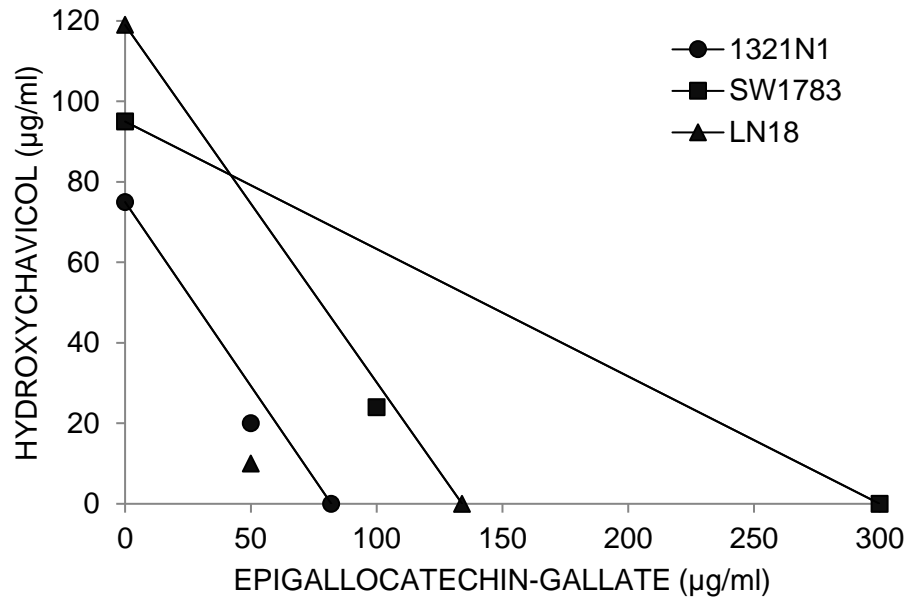

**Supplementary Figure S1.** Isobologram analysis of the effects of EGCG and HC on glioma cells. The IC<sub>50</sub> of EGCG and HC were plotted on the x and y axes. The line connecting these dots depicts the treatment concentrations of each compound that, if administered in combination, would cause the same growth inhibition if the interaction between these compounds was additive. The data point on the isobologram reflects the actual dosages of EGCG+HC that result in a 50% growth inhibition. Since the data point is located significantly below either line, a synergistic anti-proliferative impact is suggested.
